1 **Water-immersion finger-wrinkling improves grip efficiency in handling wet objects**

2

3 Nick J. Davis

4

5 Department of Psychology

6 Manchester Metropolitan University

7 Manchester M15 6GX

8 United Kingdom

9 n.davis@mmu.ac.uk

10

11

12

13

14 **Abstract**

15           For most people, immersing their hands in water leads to wrinkling of the skin of the  
16 fingertips. This phenomenon is very striking, yet we know little about why it occurs. It has  
17 been proposed that the wrinkles act to distribute water away from the contact surfaces of the  
18 fingertip, meaning that wet objects can be grasped more readily. This study examined the  
19 coordination between the grip force used to hold an object and the load force exerted on it,  
20 when participants used dry or wrinkly fingers, or fingers that were wet but not wrinkly. The  
21 results showed that wrinkly fingers reduce the grip force needed to grip a wet object, bringing  
22 that force in line with what is needed for handling a dry object. The results suggest that  
23 enhancing grip force efficiency in watery environments is a possible adaptive reason for the  
24 development of wrinkly fingers.

25

26

27 **Keywords:** Motor control; coordination; precision grip; human evolution

28

29

## 30 **Background**

31           When human hands and feet are immersed in water, over time the skin becomes  
32 wrinkled. The wrinkling is mainly confined to the pads of the fingertips and to the toes.  
33 Explanations for the wrinkling of the skin include a passive response of the skin to  
34 immersion, or an active process that creates the wrinkles for a functional purpose. There is  
35 overwhelming evidence that finger-wrinkling is an active process. The small blood vessels of  
36 the fingertip constrict, which creates valleys in the skin surface, triggered by water entering  
37 sweat pores (1). Note that a passive explanation would usually assume that water absorbs into  
38 the skin, pushing up ridges. This vasoconstriction appears to occur most readily at a  
39 temperature of around 40° Celsius, or the temperature of a warm bath (2). People with  
40 autonomic neurological conditions including Parkinson's, cystic fibrosis, congestive heart  
41 failure or diabetic neuropathy may show abnormal or asymmetric wrinkling in the affected  
42 parts of the body (3-5).

43           Given that finger-wrinkling is actively maintained, the natural question is why this  
44 would happen. It has been suggested that active finger-wrinkling is an adaptation to aid  
45 grasping of objects in watery environments. In order to grasp an object, the grip force used to  
46 stabilise the object must be enough to balance the load force, which is generated by the mass  
47 of the object and is affected by movements of the object, and must take into account the  
48 friction of the interface between the fingertips and the object surface (6-8). Put simply, a wet  
49 stone needs to be gripped harder than the same stone when it is dry, as the friction of the  
50 contact surface is reduced due to the water. Many authors have linked the wrinkling of the  
51 fingertips to this grip- and load-force coordination, with the suggestion that the wrinkles act  
52 in the same way as the treads on a car tyre, which help to channel water and to provide ridges  
53 of drier contact surfaces on the road (9).

54           If finger wrinkles do indeed aid grasping, we would expect to see this reflected in the  
55 grip force used to manipulate an object. Grip and load force are tightly coupled in both static  
56 and dynamic grasps. In consciously-initiated movements grip force changes in parallel with  
57 the change in load, and slightly precedes it, suggesting a degree of planning of grip force to  
58 cope with the changes of load induced by the inertia of the grasped object (6).

59           In this study grip and load force was measured in a task where participants gripped an  
60 instrument between finger and thumb, and used this to track a load force target as it moved  
61 across a screen. It was hypothesised that participants with wrinkly fingers would be more  
62 efficient in their grip force than participants with wet but non-wrinkly fingers.

63

64

## 65 **Methods**

### 66 *Ethics*

67           All data reported here were collected while the author was in residence at the Science  
68 Museum in London, UK. Ethical approval was granted both by the author's then institution,  
69 the Department of Psychology, Swansea University, UK, and by the Science Museum.  
70 Participants aged 18 or over gave written informed consent to take part in the study, while  
71 parental consent was given in the case of people under 18.

### 72 *Participants*

73           After giving informed consent, participants allocated themselves to one of three  
74 conditions: these were 'Dry' for people who used dry fingers when taking part, 'Wet' for  
75 people who briefly dipped their fingers in water prior to data collection, or 'Wrinkly' for  
76 people whose fingers were wrinkled during the experiment. 546 people initially took part in  
77 the experiment.

78 *Procedure*

79 To generate wrinkled fingers, participants immersed their preferred hand in a bath of  
80 water kept at 30° Celsius, until the fingertips were visibly wrinkled to the satisfaction of the  
81 experimenter. To collect grip- and load-force data, two load cells were linked together such  
82 that the participant gripped one load cell between the finger and thumb of their preferred  
83 hand (NovaTech F255, NovaTech Measurements Ltd., UK), and could push or pull the  
84 second load cell vertically (NovaTech F256). The arrangement of the load cells is shown in  
85 Figure 1. The load cells were connected to a laptop that displayed the output of the vertical  
86 load, using a custom program written in Matlab (The Mathworks, Natick, MA). During a  
87 trial, participants were asked to follow a trace that appeared on the screen of the laptop. The  
88 target trace appeared as a solid blue line that swept left-to-right across the screen, and the  
89 instantaneous output of the vertical load cell was shown as a red circle, with the ‘history’ of  
90 this vertical force shown on the screen as pale dots. Each trial lasted 15 sec. The target trace  
91 was static at 0.5 N for 3.5 sec, then rose to 2 N over the course of 3 sec, then was static at 2 N  
92 for 4 sec, and dropped to 0.5 N over 3 sec, where it remained for the rest of the trial.  
93 Participants each contributed eight trials. Data from the both load cells were digitised at 1000  
94 Hz and stored for later analysis.

95 FIGURE 1 HERE

96 *Data analysis*

97 The grip- and load-force data and the target trace were aligned in time, and the load  
98 cell data were low-pass filtered with a second-order Butterworth filter set at 20 Hz. Task  
99 performance was assessed by determining the correlation between the target force and the  
100 load trace, and subjecting these values to a one-way analysis of variance between groups. The  
101 primary measure of interest was the ratio of the grip force to the load force. A segment of  
102 3,000 samples (3 sec) was taken from the static phase of the lift. The mean load force and the

103 mean grip force were taken from this time range, and a mean grip:load force ratio was taken  
104 for each participant. These measures were subjected to a one-way analysis of variance, with  
105 fingertip condition as a between-subjects factor (Wet, Dry or Wrinkled). The lag between the  
106 change of grip force and the change of load force was also measured, using a cross-  
107 correlation between the two traces with a maximum lag of  $\pm 150$  ms. Individual trials were  
108 excluded from analysis if the load force trace did not significantly differ from 0 N in the  
109 second half of the static hold (suggesting that the participant was not following the target), or  
110 if the grip force was more than ten times greater than the load force (suggesting an  
111 excessively high grip), and a participant was excluded from analysis if more than three trials  
112 were excluded based on these criteria.

### 113 *Data accessibility*

114 All raw and processed data files from this experiment are available at Figshare.com:  
115 <https://doi.org/10.6084/m9.figshare.13201169>. All analyses were conducted in Matlab, and  
116 the analysis routine is available in the same repository.

117

## 118 **Results**

119 After automatic analysis of the force traces, 516 participants' data were analysed. Of  
120 these participants, 309 identified as female and 217 as male, and the mean age was 17.7 (SD  
121 13.1). 55 participants chose to use their left hand and 461 their right. 231 participants chose  
122 to take part in the Dry condition, 74 in the Wet, and 211 in the Wrinkly condition.

123

FIGURE 2 HERE

124 Figure 2 shows the mean traces for the three different conditions. The participants'  
125 target force is shown as a black line. The load force traces follow this target line reasonably  
126 well, which was expected as the load force was visible to participants as a cursor. The grip

127 force exceeds the load force, as expected. However there is a clear separation between the  
128 three traces, with participants with wet fingers using more fingertip force than those who  
129 used dry fingers, and with the wrinkly fingers lying between the two.

130 The correlation between the participants' load force and the target force was good,  
131 with no differences between groups [ $F(2,513)=0.953$ ,  $p=0.386$ ], and with a mean Pearson's  
132 correlation coefficient of 0.628, suggesting that the participants' primary task was executed  
133 successfully. A one-way analysis of variance found that the mean of the ratio of grip to load  
134 force was different between the conditions [ $F(2,513)=8.136$ ,  $p=0.0003$ ]. Post hoc  
135 comparisons found that the ratio was significantly higher for Wet than for Dry ( $p=0.0002$ ) or  
136 for Wrinkly ( $p=0.0063$ ), but that Dry and Wrinkly did not differ from each other ( $p=0.384$ ).  
137 There was a small but significant correlation of this ratio with the age of the participant  
138 [ $r(514)=-0.149$ ,  $p<0.001$ ]. The ratio declined by 0.014 per year of age, although the variance  
139 explained by a linear regression was very low ( $R^2=0.022$ ).

140 The lag between the change in grip force and the change in load force was not  
141 significantly different between the three groups of participants [ $F(2,513)=0.359$ ,  $p=0.699$ ],  
142 but the overall lag was significantly different from simultaneity, with GF leading LF by 22.62  
143 ms. The lag between grip and load force declined significantly with age [ $r(514)=-0.338$ ,  
144  $p<0.001$ ], with the lead of grip over load change declining by 1.36 ms for each year of age,  
145 although the variance explained by a linear regression of these values was low ( $R^2 = 0.114$ ).

146

## 147 **Discussion**

148 There is now converging evidence that finger-wrinkling is an adaptation that aids  
149 object manipulation in wet environments (9). This study has shown that grip efficiency, or the  
150 amount by which grip force exceeds the load exerted by the object, is improved when a

151 person has wet and wrinkly fingers, compared to when their fingers are wet but not wrinkly.  
152 This ratio of grip force to load force is not significantly different between wrinkly and dry  
153 fingers, nor does the relative time difference between the rise of grip force and the rise of  
154 load force. Both the grip-to-load ratio and the time difference correlated weakly but  
155 significantly with the participants' age.

156         Grip and load force coordination is an important aspect of object handling. The ability  
157 to generate the correct amount of grip force for a given load means that the minimum  
158 necessary amount of energy is used by the muscles that control the fingers and hands, and  
159 means that objects are less likely to be dropped or to be crushed. Efficient grip force  
160 coordination is seen in many extant primates, and is likely to have evolved early in the  
161 primate lineage (10). The grip force required to stabilise a wet object is greater than the force  
162 required for a dry object, since the coefficient of friction of the digit-object interface is  
163 reduced (8). It would therefore benefit an animal to gain an advantage in handling wet  
164 objects, as this would increase success in hunting and foraging in watery environments.  
165 Fingertip wrinkles would seem to afford such an advantage in object handling, and may  
166 plausibly aid travel and clambering in wet areas, especially if combined with wrinkled toes.

167         A previous study of object manipulation with wrinkled fingers found that wet objects  
168 were moved more quickly when the fingers were wrinkly compared to dry (11). Importantly,  
169 there is no difference in tactile sensitivity in wrinkled fingers compared to dry (12), meaning  
170 that people are not trading off acuity for friction at the fingertip. It is therefore reasonable to  
171 wonder why healthy people do not have permanently wrinkled fingers. The answer  
172 presumably lies in the changes in the mechanical properties of the finger tissues, where there  
173 may be lower shear resistance when the finger is wrinkled (13). Previous studies have also  
174 suggested differences in manipulation across the lifespan (14-16); the present results show  
175 age-related effects, although they are rather weak in this sample.



176           The results presented here should be read in the context of the experiment itself. The  
177 age distribution in this sample was rather low, reflecting the public engagement setting of the  
178 data collection. Although the effects of age in the data reported here were very small, they  
179 were nevertheless statistically significant, so this should be taken into account when  
180 comparing these results with others. There may also be effects on performance from inter-  
181 individual differences in hand size, in levels of subcutaneous fat, or in lifestyle or genetic  
182 factors that were not measured here. Finally the experiment only tested one target force  
183 pattern and one fingertip contact surface; it is likely that changing the dynamics of the load  
184 and the properties of the object would affect grip force coordination (6, 17).

185           In summary, this experiment investigated fine motor coordination when the fingers  
186 are affected by water-induced finger-wrinkling. Finger-wrinkling improves grip force  
187 coordination when compared to fingers that are wet but not wrinkly, and brings the  
188 performance to a level comparable with dry fingers. These results help to explain why  
189 humans and their close primate relatives may have developed finger-wrinkling as an  
190 adaptation to aid locomotion and foraging in wet environments.

191

192

193

194 **Acknowledgements:** The author is grateful to the staff of the Science Museum, London, for  
195 access to the Live Science gallery. Particular thanks are due to Georgie Ariaratnam, and to  
196 the many visitors who took part in, or discussed, the experiment.

197

198

199 **References**

- 200 1. Wilder-Smith EP, Chow A. Water-immersion wrinkling is due to vasoconstriction.  
201 *Muscle Nerve*. 2003;27(3):307-11.
- 202 2. Cales L, Weber RA. Effect of water temperature on skin wrinkling. *J Hand Surg Am*.  
203 1997;22(4):747-9.
- 204 3. Djaldetti R, Melamed E, Gadoth N. Abnormal skin wrinkling in the less affected side  
205 in hemiparkinsonism-a possible test for sympathetic dysfunction in Parkinson's disease.  
206 *Biomed Pharmacother*. 2001;55(8):475-8.
- 207 4. Kamran H, Salciccioli L, Lazar JM. Reduced water induced skin wrinkling in  
208 congestive heart failure. *Clin Auton Res*. 2011;21(5):361-2.
- 209 5. Clark CV, Pentland B, Ewing DJ, Clarke BF. Decreased skin wrinkling in diabetes  
210 mellitus. *Diabetes Care*. 1984;7(3):224-7.
- 211 6. Flanagan J, Tresilian J. Grip-load force coupling: A general control strategy for  
212 transporting objects. *Journal of Experimental Psychology: Human Perception and*  
213 *Performance*. 1994;20:944-57.
- 214 7. Flanagan J, Wing A. Modulation of grip force with load force during point-to-point  
215 arm movements. *Experimental Brain Research*. 1993;95:131-43.
- 216 8. Cadoret G, Smith AM. Friction, not texture, dictates grip forces used during object  
217 manipulation. *J Neurophysiol*. 1996;75(5):1963-9.
- 218 9. Changizi M, Weber R, Kotecha R, Palazzo J. Are wet-induced wrinkled fingers  
219 primate rain treads? *Brain Behav Evol*. 2011;77(4):286-90.
- 220 10. Feix T, Kivell TL, Pouydebat E, Dollar AM. Estimating thumb-index finger precision  
221 grip and manipulation potential in extant and fossil primates. *J R Soc Interface*.  
222 2015;12(106).
- 223 11. Kareklas K, Nettle D, Smulders TV. Water-induced finger wrinkles improve handling  
224 of wet objects. *Biol Lett*. 2013;9(2):20120999.
- 225 12. Haseleu J, Omerbašić D, Frenzel H, Gross M, Lewin GR. Water-induced finger  
226 wrinkles do not affect touch acuity or dexterity in handling wet objects. *PLoS One*.  
227 2014;9(1):e84949.
- 228 13. Yin J, Gerling GJ, Chen X. Mechanical modeling of a wrinkled fingertip immersed in  
229 water. *Acta Biomater*. 2010;6(4):1487-96.
- 230 14. Gilles M, Wing A. Age-Related Changes in Grip Force and Dynamics of Hand  
231 Movement. *Journal of Motor Behavior*. 2003;35:79-85.
- 232 15. Lindberg P, Ody C, Feydy A, Maier MA. Precision in isometric precision grip force is  
233 reduced in middle-aged adults. *Exp Brain Res*. 2009;193(2):213-24.
- 234 16. Forssberg H, Eliasson AC, Kinoshita H, Johansson RS, Westling G. Development of  
235 human precision grip. I: Basic coordination of force. *Exp Brain Res*. 1991;85(2):451-7.
- 236 17. Flanagan J, Wing A, Allison S, Spenceley A. Effects of surface texture on weight  
237 perception when lifting objects with a precision grip. *Perception & Psychophysics*.  
238 1995;57:282-90.

239

240

241 FIGURE 1

242

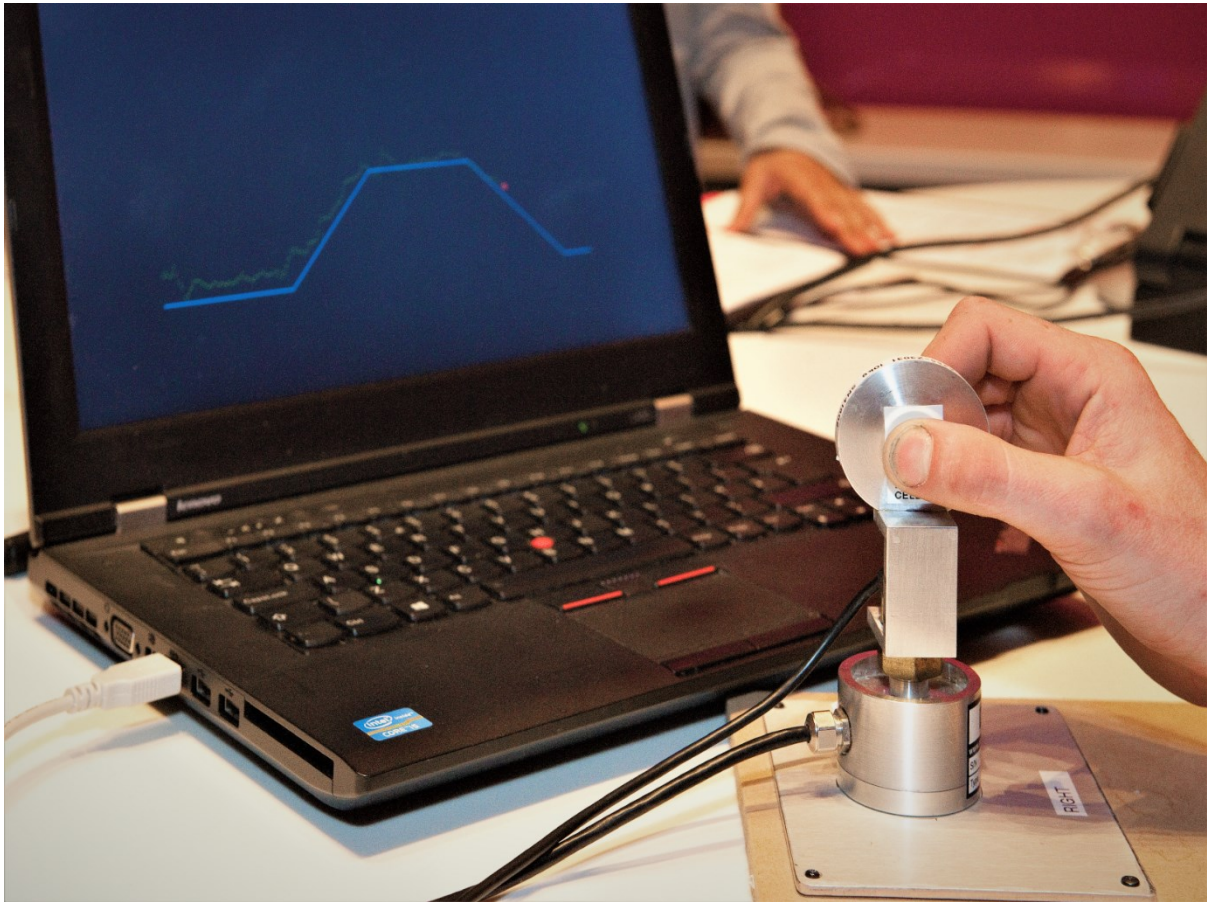

243

244

245           Picture of the equipment in use. The participant is gripping a load cell between finger  
246 and thumb. The participant's task is to pull up on the second load cell to match a force trace  
247 that appears on the laptop monitor. The current load force is shown as a red circle, and the  
248 history of the participant's force is shown as a trail of green dots.

249

250 FIGURE 2

251

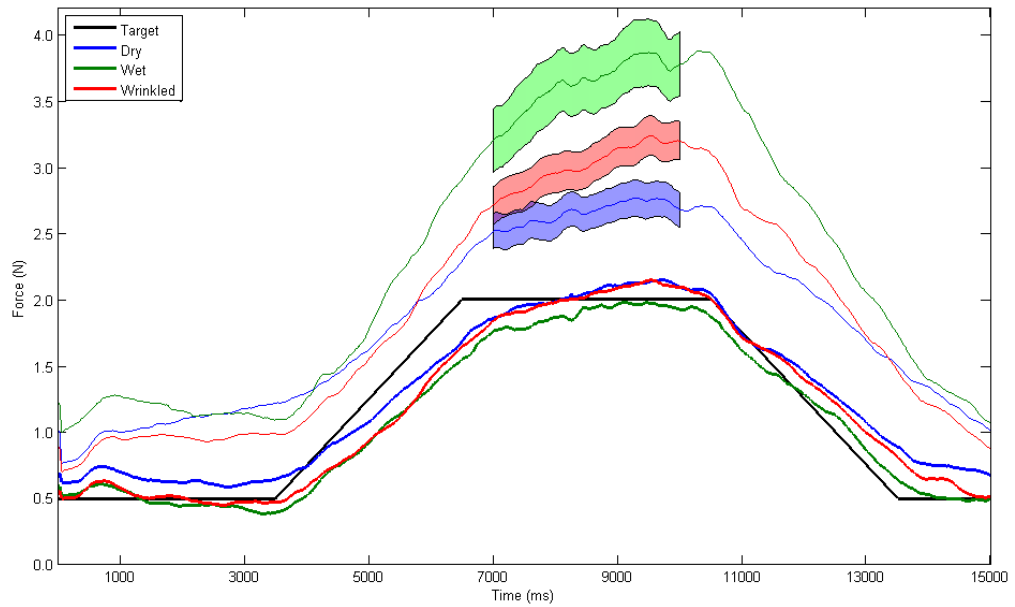

252

253

254

255 Mean grip force (thinner traces) and load force (thicker traces) when participants  
256 tracked a load weight target (black line). Participants with wrinkled fingers produced a grip  
257 force that did not differ from that used by people with dry fingers in the static hold phase  
258 (indicated with  $\pm 1$  standard error), however people with wet but non-wrinkly fingers used a  
259 significantly higher amount of grip.
